# Supplementary material for: Fine tuning of graphene properties by modification with aryl halogens
Source: Royal Society of Chemistry journal article supplement (doi:10.1039/c5nr06295k), 2015-12-03
Supplement: c5nr06295k1.pdf [file c5nr06295k1.pdf]

## Supporting information for Nanoscale

### Fine tuning of graphene properties using modification with aryl halogens

D. Bouša <sup>a</sup>, M. Pumera <sup>b</sup>, D. Sedmidubský <sup>a</sup>, J. Šturala <sup>c</sup>, J. Luxa <sup>a</sup>, V. Mazánek <sup>a</sup> and Z. Sofer <sup>a,\*</sup>

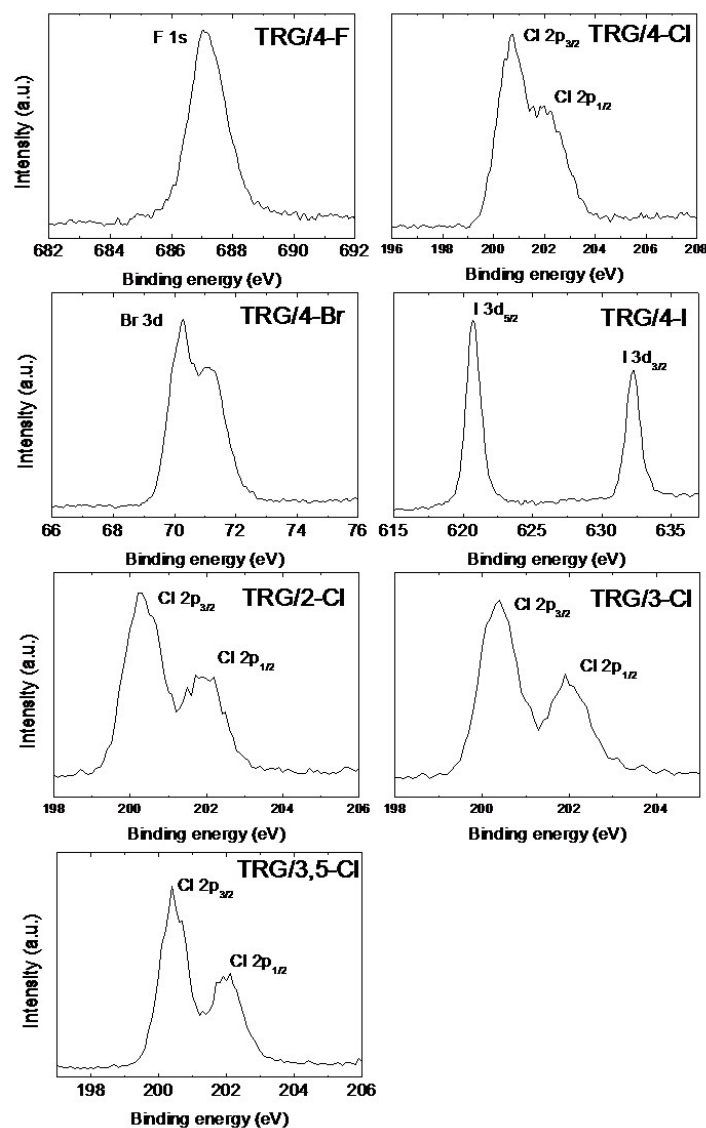

**Figure SI 1.** High-resolution XPS spectra of F 1s, Cl 2p, Br 3d and I 3d of the modified graphenes.

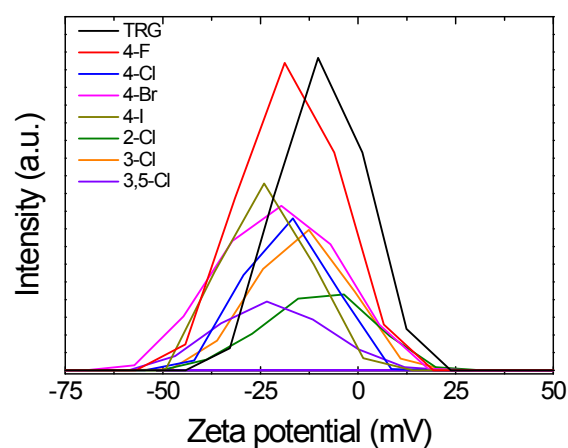

**Figure SI 2.** Zeta potential distribution of modified graphenes. The measurement was performed on suspension (1 mg/mL) in 50 mM PBS at pH=7.0.

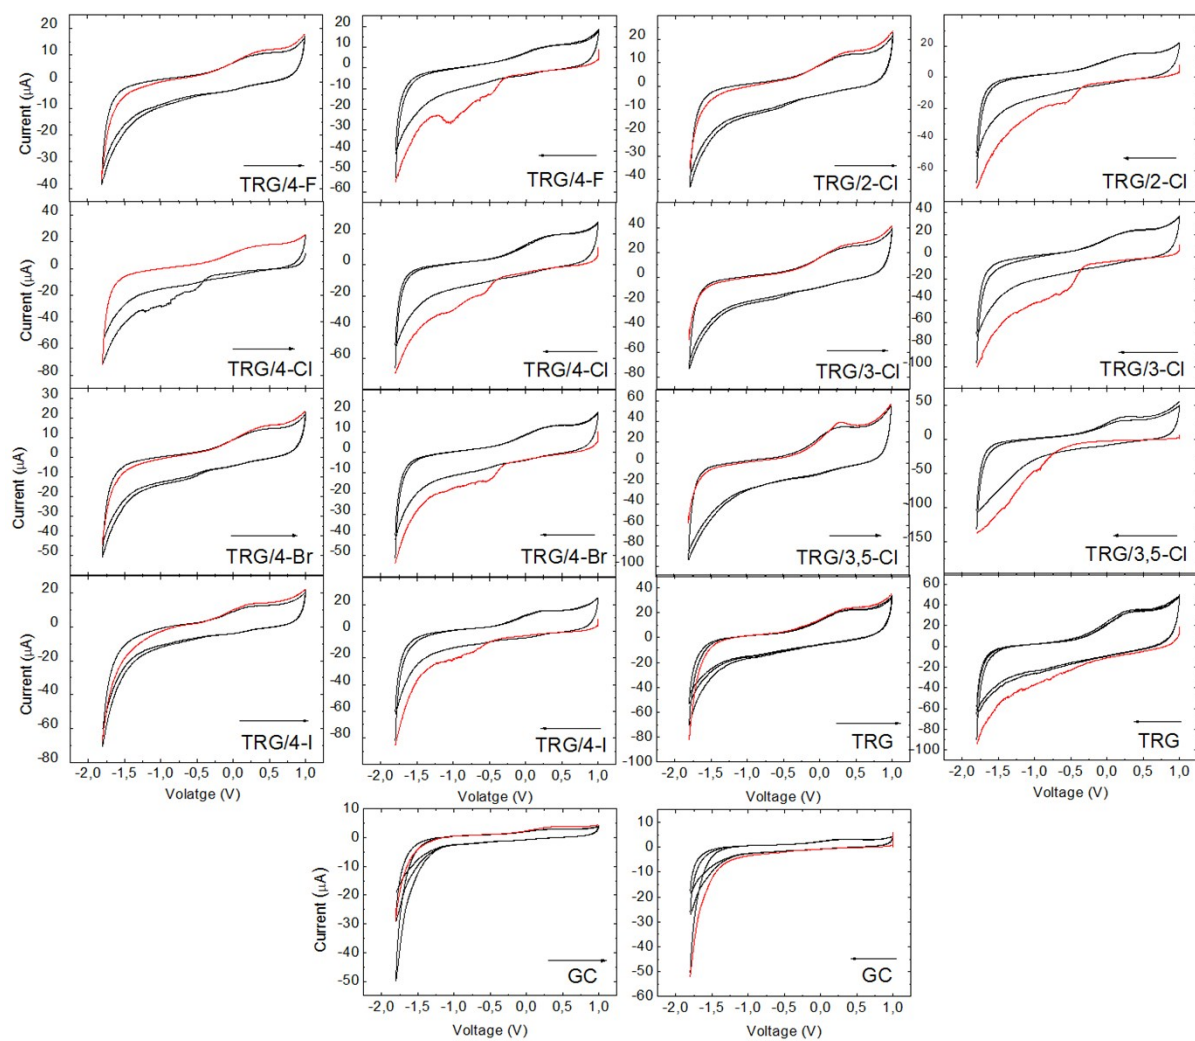

**Figure SI 3.** Inherent electrochemistry of the modified graphenes by diazonium salts using anodic and cathodic scan.
